# Supplementary material for: Resumption of donor-origin spermatogenesis in senescent goldfish Carassius auratus (Linnaeus, 1758) following spermatogonial cell therapy
Source: PeerJ journal article supplement (doi:10.7717/peerj.9116), 2020-08-13
Supplement: Raw_Data_PeerJ.xlsx [file Raw_Data_PeerJ.xlsx]

## Sheet: Cell count
cont-0day	senile-0 day	Cont-6 month	Senile-6 month
80	0	81	75
75	0	85	70
70	0	76	72
83	0	80	71
81	0	74	69

## Sheet: GSI
cont-0day	senile-0 day	Cont-6 month	Senile-6 month
4.1	0.8	5.2	4.1
5.2	0.9	5.2	4
5.1	1	4.1	4.5
4.3	0.7	5.5	4.1
4.5	0.82	4.8	3.9

## Sheet: Vasa gene
cont-0day	senile-0 day	Cont-6 month	Senile-6 month
0.8	0.1	0.92	0.82
0.9	0.05	0.77	0.71
0.6	0.02	0.71	0.66
0.8	0.1	0.82	0.7
0.7	0.01	0.95	0.65
